# Supplementary material for: Whole Genome Sequence Analysis of a Large Isoniazid-Resistant Tuberculosis Outbreak in London: A Retrospective Observational Study
Source: PubMed Central journal article supplement (PMC5049847; doi:10.1371/journal.pmed.1002137), 2016-10-04
Supplement: pmed.1002137.s006.pdf [file pmed.1002137.s006.pdf]

## PRELIMINARY APPLICATION FOR PATHOGEN SEQUENCING PROJECT MANAGEMENT MEETING

Reference number:

- This form should only be used for projects related to the Pathogen-Variation Programme working group.
- Please send the completed form to Sophie Palmer ([sophie@sanger.ac.uk](mailto:sophie@sanger.ac.uk)) and Bridget Jasper ([bj3@sanger.ac.uk](mailto:bj3@sanger.ac.uk)).
- Please complete all sections and relevant drop-down boxes.

### SECTION A: GENERAL INFORMATION

**1. Name of WTSI project manager**

**2. Date**

**3. SAC sponsor**

**4. In collaboration with (name, institution and contact details)**

**5. Species and size of genome**

**6. Project title**

**7. Description of the project, including a summary of the scientific merits, outcomes or goals and concepts which form the basis of the proposal, the stated aims, and tasks to be performed at Sanger (~1 page)**

decontaminated sputum sample from an outbreak case. DNA will be isolated from 96 individual colonies, without further subculture, to minimise possible in vitro selection. For about five cases, serial isolates obtained over the course of therapy are available (3mo to 1yr between isolates). These include pulmonary and extrapulmonary specimens from the same patient. Sequencing of these isolates will enable us to investigate within host evolution during the course of an infection.

Sequencing the genomes of *M. tuberculosis* isolates from an outbreak spanning 15 years affords a unique opportunity to study the evolution of this strain within a community. Furthermore, this project will provide much needed data to inform the debate on the utility of sequencing of whole genome sequencing as a routine typing tool. The data will enable us to explore:

- the rate of mutation
- diversity within and between hosts
- genetic determinants of epidemiological success
- genetic bottlenecks associated with drug resistance, dissemination to extrapulmonary sites and transmission
- the importance of natural selection versus genetic drift
- correlation between molecular fingerprint-derived clusters and SNP clusters
- whether the direction of transmission between contacts can be determined or superspreaders identified

**8. Anticipated project start date**

December 2012

**9. Anticipated date samples available in-house**

December 2012

**11. Will you be using the data coordination team?**

(DNA Pipeline services 1 team184)

**10. Project duration (months) or end date**

12
